# Supplementary material
Source: PubMed Central journal article supplement (PMC4004238)
Supplement: ja410542z_si_001.pdf [file ja410542z_si_001.pdf]

**The production of nitrous oxide (N<sub>2</sub>O) by the heme/nonheme  
diiron center of engineered myoglobins (Fe<sub>B</sub>Mbs) proceeds  
through a *trans* iron-nitrosyl dimer**

**Hirotohi Matsumura,<sup>1</sup> Takahiro Hayashi,<sup>1,‡</sup> Saumen Chakraborty,<sup>2</sup> Yi Lu,<sup>2</sup> and  
Pierre Moënne-Loccoz<sup>1\*</sup>**

<sup>1</sup>Division of Environmental & Biomolecular Systems, Institute of Environmental Health, Oregon Health &  
Science University, 3181 SW Sam Jackson Park Road, Portland, Oregon 97239-3098

<sup>2</sup>Department of Chemistry, University of Illinois at Urbana-Champaign, Urbana, Illinois 61801

**Supporting information**

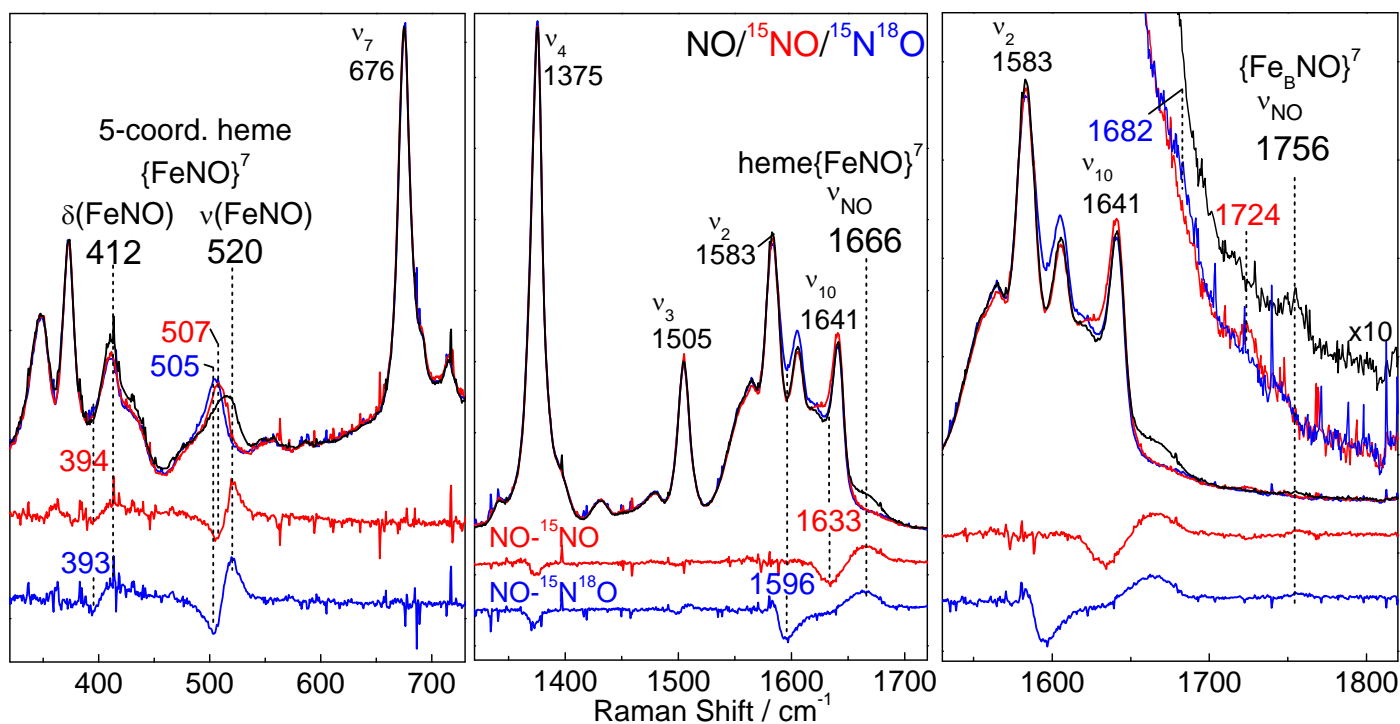

**Figure S1.** Room temperature RR spectra of the end-product of the reaction of reduced  $\text{Fe}_B\text{Mb1}$  with excess NO (protein concentration, 100  $\mu\text{M}$ ; samples frozen  $\sim 2$  min after the addition of NO; excitation wavelength: 406 nm).

**Figure S2.** High-frequency region of the RR spectra of the 6-ms and 140-ms RFQ samples of the reaction of reduced  $\text{Fe}_B\text{Mb2}$  with excess  $^{14}\text{NO}$  (back traces),  $^{15}\text{NO}$  (red traces), and the resulting  $^{14}\text{NO} - ^{15}\text{NO}$  difference spectra (blue traces). Also shown are the equivalent spectra for end-point samples (frozen  $\sim 2$  min after mixing).

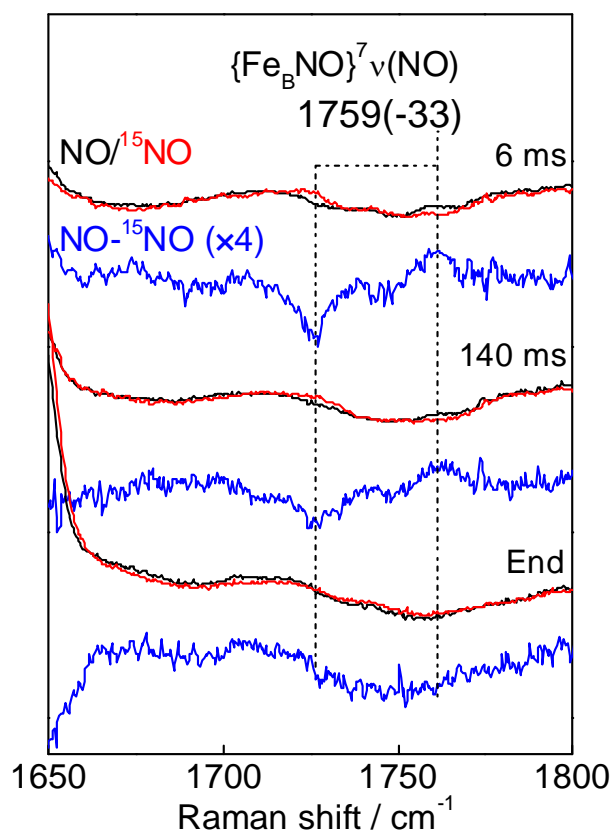

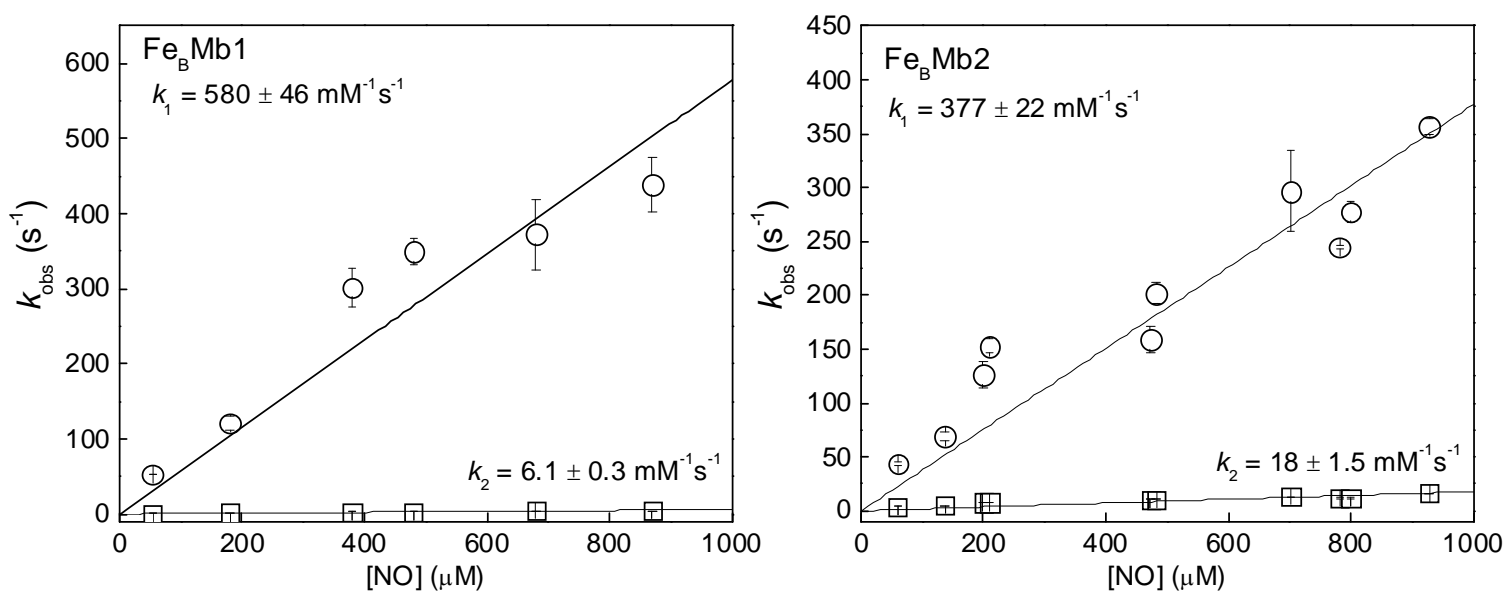

**Figure S3.** The dependence of the rate constants of  $k_1$  and  $k_2$  on NO concentration.

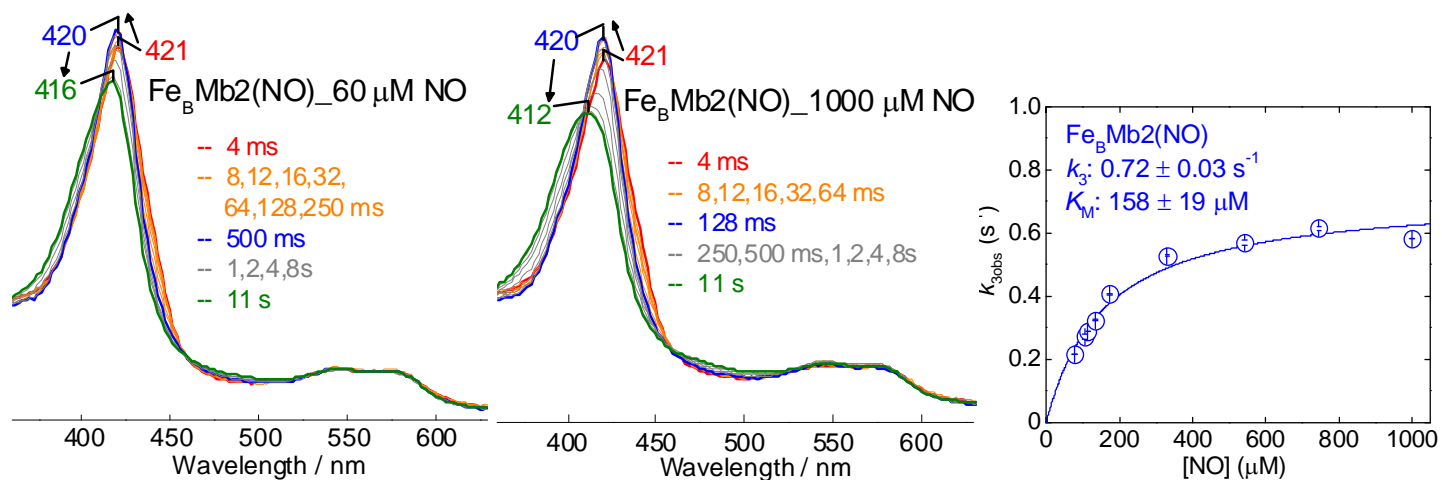

**Figure S4.** Stopped-flow UV-vis absorption spectra of the reaction of Fe<sub>B</sub>Mb2(NO) with 60 and 1000  $\mu\text{M}$  NO at 4.0 °C. Also shown, is the dependence of the last rate constant on NO concentration.
